# Supplementary material
Source: PubMed Central journal article supplement (PMC3852677)
Supplement: NIHMS520801-supplement-01.pdf [file NIHMS520801-supplement-01.pdf]

## SUPPLEMENTAL MATERIALS

### CTP synthase, a smooth muscle-sensitive therapeutic target for effective vascular repair

Rui Tang, Xiao-Bing Cui, Jia-Ning Wang, and Shi-You Chen

**Supplemental Table I: Primer sequences used in this study.**

| Primer name | Sequence                  |
|-------------|---------------------------|
| mmu-CTPS2-F | GGCATTGGTAAAGGGATTATCGC   |
| mmu-CTPS2-R | AAGGTGAGAAAGTTCCAGCATC    |
| mmu-CTPS1-F | CCGCCAGTTCAGTTCAAG        |
| mmu-CTPS1-R | CACCTGCACACCACTAAGTC      |
| mmu-NME1-F  | TCAGGACCAGTGGTTGCTATG     |
| mmu-NME1-R  | CTCTTTACAGAATCGCTGCCAT    |
| mmu-NME2-F  | ATCGACCTGAAAGACCGTCCT     |
| mmu-NME2-R  | TCAGTTCTTCGGGCTTAAACC     |
| rno-CTPS2-F | TTGCCTTGGGATGCAACTGGC     |
| rno-CTPS2-R | CGCCAGGGTTGTGTTTCAGGC     |
| rno-CTPS1-F | TTATCGCCAGCAGTGTGGGCA     |
| rno-CTPS1-R | TCCACCATCATCCAGCACAAAGACT |
| rno-NME1-F  | CCGCCCTTCTTTTCTGGCCT      |
| rno-NME1-R  | CCAAGCATCACCCGGCCTGTC     |
| rno-NME2-F  | CGAGCAGAAGGGGTTCGCC       |
| rno-NME2-R  | GCCCCGGAAGAAAGGACGG       |
| mmu-CMPK-F  | AGAATCCAGACTCACAGTATGGT   |
| mmu-CMPK-R  | GCAGCCATTGTTTGGTCCA       |
| mmu-UCK1-F  | TTTTGTGACCCACTCAAGGTTAC   |
| mmu-UCK1-R  | CCGGAGAACTCTTCGAGACAG     |
| mmu-UCK2-F  | CTTCCGTTTGTGCTAAGATCGT    |
| mmu-UCK2-R  | TCGGTAGAAGCTATCCTGGCT     |
| rno-CMPK-F  | GAGCTTCCC GCCGCTAACCC     |
| rno-CMPK-R  | GGCCCCGCCCAAACGAACA       |
| rno-UCK1-F  | CGGCCGTTTCTCATCGGCGT      |
| rno-UCK1-R  | CCGGCGGTCCACTTCGTTCT      |
| rno-UCK2-F  | AACCACCAGCAGCCCAACGG      |
| rno-UCK2-R  | TCTGCCCCAGAAGCTGGACGA     |

**Supplemental Figure I:**

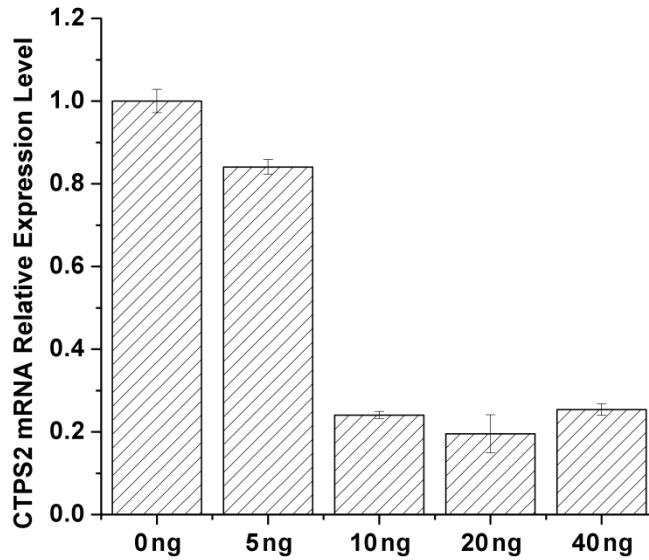

**Figure I: CTPS2 mRNA expression in PDGF-BB-treated RASMCs.** Unlike CTPS1, CTPS2 was decreased by PDGF-BB.

**Supplemental Figure II:**

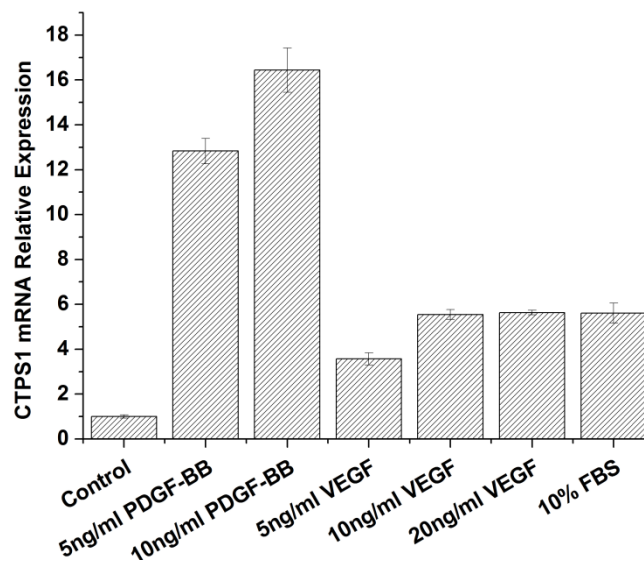

**Figure II: CTPS1 expression in proliferating endothelial cells.** CTPS1 mRNA was significantly increased in C166 cells when treated with PDGF-BB, VEGF, or 10% FBS.

**Supplemental Figure III:**

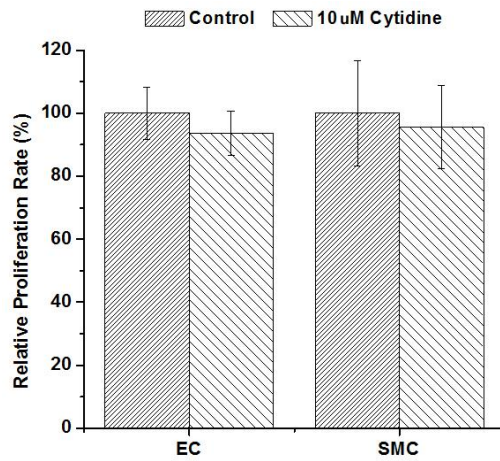

**Figure III: Abundant CTP did not accelerate EC or SMC proliferation.**

**Supplemental Figure IV:**

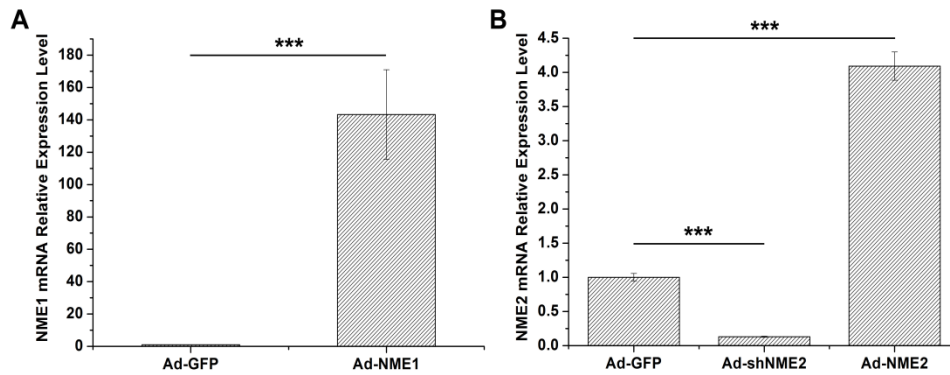

**Figure IV: The efficiency of NME1 and NME2 overexpression and shRNA knockdown.** (A) NME1 overexpression efficiency was confirmed by qPCR. (B) NME2 overexpression and shRNA knockdown efficiency were confirmed by qPCR. \* $P < 0.05$ , \*\* $P < 0.01$ , \*\*\* $P < 0.001$  (n=3).

Supplemental Figure V:

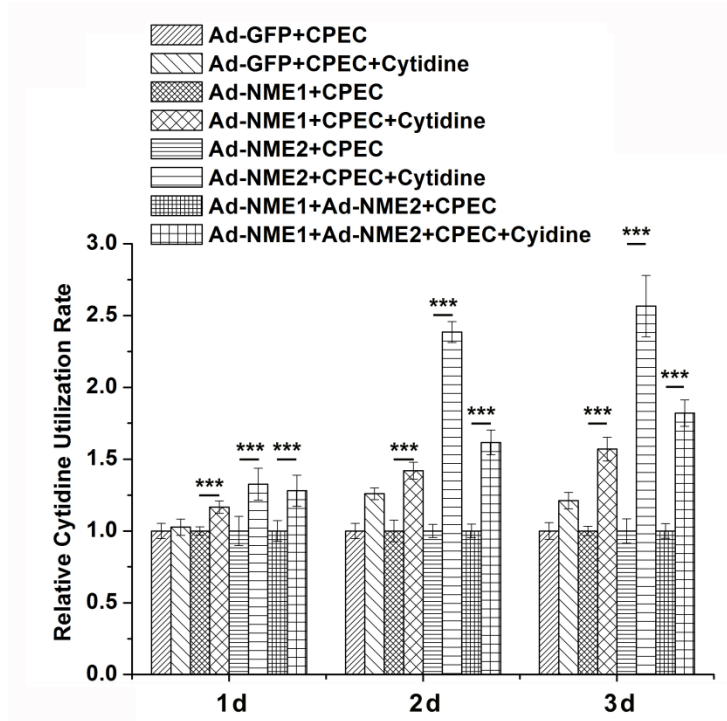

Figure V: NME1 or NME2 overexpression increased the ability of SMCs in utilizing extracellular cytidine for their proliferation. \* $P < 0.05$ , \*\* $P < 0.01$ , \*\*\* $P < 0.001$  (n=8).
